# Supplementary material for: Simple models including energy and spike constraints reproduce complex activity patterns and metabolic disruptions
Source: PLOS journal article supplement (doi:10.1371/journal.pcbi.1008503), 2020-12-21
Supplement: S4 (10.1371/journal.pcbi.1008503.s004) [file journal.pcbi.1008503.s004]

| Model       | None | LIF | AdExp | $e$ LIF     | mAdExp      | HH   | HH+Ca |
|-------------|------|-----|-------|-------------|-------------|------|-------|
| Runtime (s) | 0.75 | 0.8 | 2.7   | 2.86 (1.79) | 3.52 (2.56) | 3.47 | 4.92  |

**S1 Table.** Runtime of various models in NEST. A “baseline” run with no neuron (None), compared to runs with one neuron of each of the mentioned models. For the new energy-based models ( $e$ LIF and mAdExp), two runs were performed: one using a naive implementation and another using slightly optimized implementation (numbers in parentheses). Conductance-based models are also included: a standard Hodgkin-Huxley (HH) model which can display regular spiking and a depolarization block, and one with calcium and calcium-gated potassium (HH+Ca) to reproduce bursting dynamics
